# Supplementary material for: Non-Additive and Asymmetric Allelic Expression of p38 mapk in Hybrid Tilapia (Oreochromis niloticus ♀ × O. aureus ♂)
Source: MDPI journal article supplement (doi:10.3390/ani14020266), 2024-01-15
Supplement: s1 [file s1]

| Number | AR(A) | NL(G) |
|--------|-------|-------|
| 1      | 25.28 | 74.72 |
| 2      | 10.21 | 89.79 |
| 3      | 29.41 | 70.59 |
| 4      | 26.12 | 73.88 |
| 5      | 29.63 | 70.37 |
| 6      | 29.18 | 70.82 |
| 7      | 3.09  | 96.91 |
| 8      | 30.27 | 69.73 |
| 9      | 24.00 | 76.00 |
| 10     | 28.48 | 71.52 |
| 11     | 8.57  | 91.43 |
| 12     | 33.18 | 66.82 |
| 13     | 11.72 | 88.28 |
| 14     | 21.39 | 78.61 |
| 15     | 29.32 | 70.68 |
| 16     | 27.18 | 72.82 |
| 17     | 31.25 | 68.75 |
| 18     | 31.89 | 68.11 |
| 19     | 24.34 | 75.66 |
| 20     | 6.59  | 93.41 |

Above are the pyrophosphate sequencing results of *p38* gene in the parental species.

Table S1. Pyrophosphate sequencing *p38* expression bias raw data statistics.
